# Supplementary material for: Sulfiredoxin as a Potential Therapeutic Target for Advanced and Metastatic Prostate Cancer
Source: PubMed Central journal article supplement (PMC7201699; doi:10.1155/2020/2148562), 2020-01-20
Supplement: 2148562.f1.pdf [file 2148562.f1.pdf]

## Supplementary Materials

**Table S1. Clinical data of the patients whose prostate biopsy was used in the preparation of the tissue microarrays (TMAs).**

| TMA number | Biopsy number/ Year | Gleason Score | Prognostic Category (ISUP) | Survival time (months) | Outcome / Final Result             | IHC Score to SRXN1 |
|------------|---------------------|---------------|----------------------------|------------------------|------------------------------------|--------------------|
| PR1        | B1375/80            | 4+4           | 4                          |                        | No information                     | 1                  |
| PR2        | BR2637 + B2686/80   | 4+4           | 4                          |                        | No information                     | 1                  |
| PR3        |                     | 4+4           | 4                          | 123                    | Death by disease                   | 1                  |
| PR4        | B3238/80            | 4+4           | 4                          | 123                    | Death by disease                   | 1                  |
| PR5/PR6    | B40/81+ B179/81     | 4+4           | 4                          | 63                     | Death by disease                   | 1                  |
| PR10       | B2734/81            | 4+4           | 4                          | 28                     | Death by disease                   | 1                  |
| PR11       | B2588/82            | 4+5           | 5                          |                        | No information                     | 1                  |
| PR12       | B1194/83            | 4+5           | 5                          |                        | No information                     | 1                  |
| PR13       |                     | 4+4           | 4                          | 32                     | Death by disease                   | 1                  |
| PR15       | B1195/85            | 5+4           | 5                          | 36                     | Death by disease                   | 1                  |
| PR16       | B1469/85            | 4+4           | 4                          |                        | No information                     | 1                  |
| PR17       | B1882/85            | 5+4           | 5                          |                        | No information                     | 0                  |
| PR19       | B88/86              | 4+4           | 4                          | 26                     | Death by disease                   | 0                  |
| PR20       | B3200/86            | 4+4           | 4                          | 160                    | Death by disease                   | 1                  |
| PR21       |                     | 3+3           | 1                          |                        | No information                     | 1                  |
| PR22       | B526/87             | 4+4           | 4                          | 49                     | Death by disease                   | 1                  |
| PR23       | B640/87             | 4+3           | 3                          |                        | Loss of follow-up                  | 1                  |
| PR24       | B1771/87            | 5+5           | 5                          |                        | No information                     | 1                  |
| PR25       | B2019/87            | 3+3           | 1                          | 215                    | Death by disease                   | 0                  |
| PR26       | B2274/87            | 5+5           | 5                          |                        | No information                     | 0                  |
| PR27       | B61/88              | * 3+4         | 2                          |                        | Loss of follow-up                  | 0                  |
| PR28       | B128/88             | 3+3           | 1                          |                        | No information                     | 1                  |
| PR29       | B905/89             | 4+4           | 4                          |                        | No information                     | 1                  |
| PR30       | B1209/89            | * 3+4         | 2                          |                        | Loss of follow-up                  | 1                  |
| PR31       | B2172/89            | 5+5           | 5                          | 120                    | Death with disease (another cause) | 1                  |
| PR32       | B4264/89            | 4+3           | 3                          | 146                    | Death by disease                   | 1                  |
| PR33       | B278/91             | 3+3           | 1                          |                        | Loss of follow-up                  | 1                  |
| PR35       | B1029/91            | 3+3           | 1                          | 159                    | Death by disease                   | 0                  |
| PR36       | B2332/91            | 3+4           | 2                          | 186                    | Death by disease                   | 0                  |
| PR37       | B4613/91            | 4+4           | 4                          | 24                     | Death by disease                   | 1                  |
| PR38       | B4645/91            | 3+3           | 1                          |                        | Loss of follow-up                  | 1                  |
| PR39       | B5072/91            | 3+4           | 2                          |                        | No information                     | 1                  |
| PR40       | B5626/91            | 4+4           | 4                          |                        | Loss of follow-up                  | 1                  |
| PR41       | B5764/91            | * 3+4         | 2                          |                        | Loss of follow-up                  | 1                  |
| PR42       | B5807/91            | 3+3           | 1                          | 148                    | Death without disease              | 1                  |
| PR43       | B273/92             | * 3+3         | 1                          |                        | No information                     | 0                  |
| PR44       | B1099/92            | 3+4           | 2                          |                        | Loss of follow-up                  | 0                  |

|      |          |       |   |     |                                                  |   |
|------|----------|-------|---|-----|--------------------------------------------------|---|
| PR45 | B1426/92 | 3+3   | 1 | 212 | Death without disease                            | 0 |
| PR46 | B2480/92 | 4+3   | 3 |     | Loss of follow-up                                | 1 |
| PR47 | B3810/92 | * 3+3 | 1 | 146 | Death without disease                            | 0 |
| PR48 | B4006/92 | 3+4   | 2 |     | Death with disease (another cause)               | 1 |
| PR49 | B4101/92 | 4+4   | 4 | 46  | Death by disease                                 | 1 |
| PR50 | B5169/92 | 4+3   | 3 | 8   | Death with disease (another cause)               | 1 |
| PR52 | B377/93  | 4+4   | 4 | 20  | Death by disease                                 | 1 |
| PR53 | B1657/93 | * 4+3 | 3 |     | Loss of follow-up                                | 0 |
| PR54 | B1805/93 | 4+3   | 3 |     | No information                                   | 0 |
| PR55 | B1935/93 | 4+3   | 3 |     | Loss of follow-up                                | 1 |
| PR56 | B2108/93 | 4+4   | 4 | 45  | Death by disease                                 | 1 |
| PR58 | B2836/93 | 5+4   | 5 |     | No information                                   | 1 |
| PR59 | B436/94  | 3+4   | 2 | 52  | Loss of follow-up                                | 0 |
| PR60 | B3616/94 | 4+3   | 3 |     | Loss of follow-up                                | 1 |
| PR61 | B1551/95 | 3+3   | 1 |     | Loss of follow-up                                | 0 |
| PR62 | B1749/95 | 3+4   | 2 |     | Loss of follow-up                                | 0 |
| PR63 | B1885/95 | 3+3   | 1 |     | Loss of follow-up                                | 0 |
| PR64 | B4371/95 | 3+4   | 2 |     | Loss of follow-up                                | 0 |
| PR66 | B6420/95 | 4+3   | 3 | 155 | Loss of follow-up                                | 0 |
| PR67 | B6972/95 | 4+3   | 3 | 43  | Death without disease                            | 1 |
| PR68 | B432/96  | 4+3   | 3 | 158 | Death by disease                                 | 0 |
| PR69 | B3480/96 | 4+4   | 4 | 28  | Death by disease                                 | 1 |
| PR70 | B3742/96 | * 3+3 | 1 |     | Loss of follow-up                                | 1 |
| PR71 | B5387/96 | * 3+3 | 1 | 215 | Live with disease                                | 0 |
| PR72 | B891/97  | 4+3   | 3 |     | Live without disease - Loss of follow-up in 2008 | 0 |
| PR73 | B1927/97 | 3+3   | 1 |     | Live without disease - Loss of follow-up in 2008 | 1 |
| PR74 | B3134/97 | 4+3   | 3 | 117 | Death with disease (another cause)               | 1 |
| PR75 |          | 4+5   | 5 |     | No information                                   | 1 |
| PR76 | B4198/97 | 5+3   | 4 | 60  | Death by disease                                 | 1 |
| PR77 | B4700/97 | 3+5   | 4 | 73  | Death by disease                                 | 1 |
| PR78 | B6280/97 | 5+4   | 5 |     | No information                                   | 0 |
| PR79 | B6487/97 | * 4+3 | 5 | 213 | Free from disease                                | 0 |
| PR80 | B7295/97 | 5+5   | 5 | 38  | Death by disease                                 | 0 |
| PR81 | B7773/97 | 5+4   | 5 | 70  | Loss of follow-up                                | 0 |
| PR82 | B1417/98 | 4+4   | 4 | 106 | Death by disease                                 | 1 |
| PR83 | B2725/98 | 3+3   | 1 |     | Loss of follow-up                                | 1 |
| PR84 | B3309/98 | 3+3   | 1 |     | No information                                   | 1 |
| PR85 | B4391/98 | 4+5   | 5 |     | Live with disease                                | 0 |
| PR86 | B4773/98 | * 4+3 | 3 |     | No information                                   | 1 |
| PR87 | B5939/98 | * 4+3 | 3 | 173 | Live with disease                                | 1 |
| PR88 | B5967/98 | 4+5   | 5 | 29  | Death by disease                                 | 1 |
| PR89 | B6513/98 | 4+3   | 3 |     | Loss of follow-up                                | 0 |
| PR90 | B7195/98 | 4+3   | 3 | 66  | Death by disease                                 | 0 |
| PR91 | B7964/98 | * 3+3 | 1 |     | Live without disease - Loss of follow-up         | 0 |

|       |           |       |   |     |                       |   |
|-------|-----------|-------|---|-----|-----------------------|---|
| PR92  | B8133/98  | 3+4   | 2 | 178 | Free from disease     | 0 |
| PR93  | B3150/99  | 3+3   | 1 | 45  | Death by disease      | 0 |
| PR94  |           | * 3+3 | 1 | 103 | Death without disease | 1 |
| PR95  |           | 4+3   | 3 | 24  | Death by disease      | 1 |
| PR99  | B6870/99  | * 3+3 | 1 |     | Loss of follow-up     | 0 |
| PR100 |           | 3+4   | 2 | 173 | Death without disease | 0 |
| PR101 | B6944/99  | 3+4   | 2 |     | Loss of follow-up     | 0 |
| PR102 | B7241/99  | 3+4   | 2 | 46  | Death by disease      | 1 |
| PR103 | B7418/99  | 3+3   | 1 |     | Loss of follow-up     | 1 |
| PR104 |           | 3+3   | 1 | 175 | Live with disease     | 1 |
| PR106 | B414/2000 | 3+3   | 1 |     | Loss of follow-up     | 0 |
| PR107 | B715/00   | 3+3   | 1 |     | Loss of follow-up     | 0 |
| PR108 | B2299/00  | 4+5   | 5 |     | No information        | 0 |
| PR109 | B3002/00  | 3+3   | 1 |     | No information        | 0 |
| PR110 | B3026/00  | * 3+3 | 1 | 141 | Live with disease     | 0 |
| PR111 | B3055/00  | 3+4   | 2 | 111 | Live with disease     | 0 |
| PR112 | B3332/00  | 3+3   | 1 | 173 | Free from disease     | 0 |
| PR113 | B4884/00  | 3+3   | 1 | 168 | Free from disease     | 1 |
| PR114 | B5059/00  | * 4+3 | 3 | 163 | Free from disease     | 1 |
| PR115 | B5394/00  | 3+3   | 1 |     | Loss of follow-up     | 0 |
| PR117 | B5967/00  | 3+4   | 2 | 177 | Free from disease     | 0 |
| PR118 | B6232/00  | 3+3   | 1 | 112 | Free from disease     | 1 |
| PR119 | B6799/00  | 3+4   | 2 | 157 | Death without disease | 0 |

\* represents samples with adjacent nonneoplastic tissue; ISUP: International Society of Urological Pathology; IHC: Immunohistochemistry

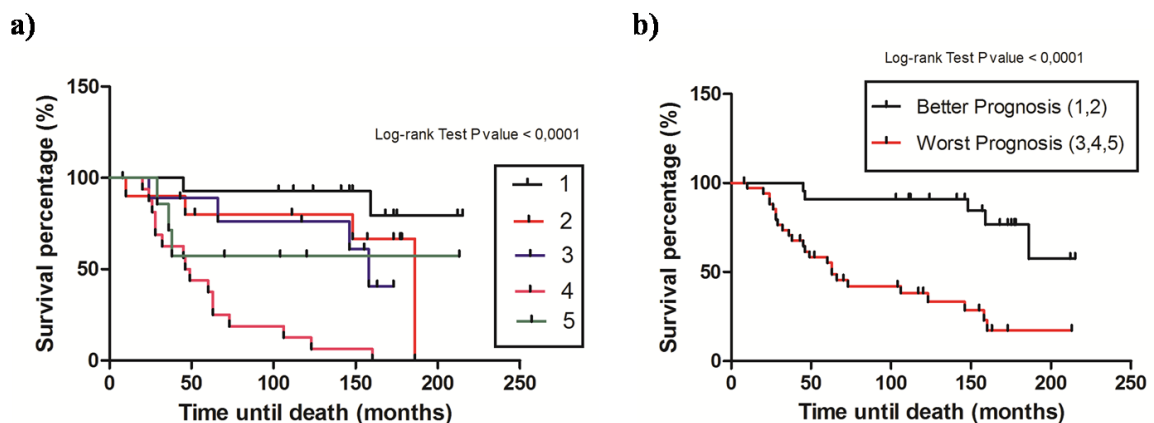

**Figure S1. Patients with prostate cancer (PCa) grouped by prognosis category (1-5) show expected survival curves. A)** Global survival curve of patients with PCa associated to prognosis category (1-5, from more differentiated to less differentiated), according to International Society of Urological Pathology (ISUP) grade. Clinical data are from those patients which prostate samples were used to construct tissue microarrays (TMAs). Kaplan-Meier curves are statistically different with  $p < 0.0001$ . **B)** Additional analysis of the same patients of Figure S1a, dividing them into groups with good prognosis

(categories 1 and 2, black curve) and worse prognosis (categories 3, 4 and 5, red curve), according to ISUP grade. Kaplan-Meier curves are significantly different with  $p < 0.0001$ .

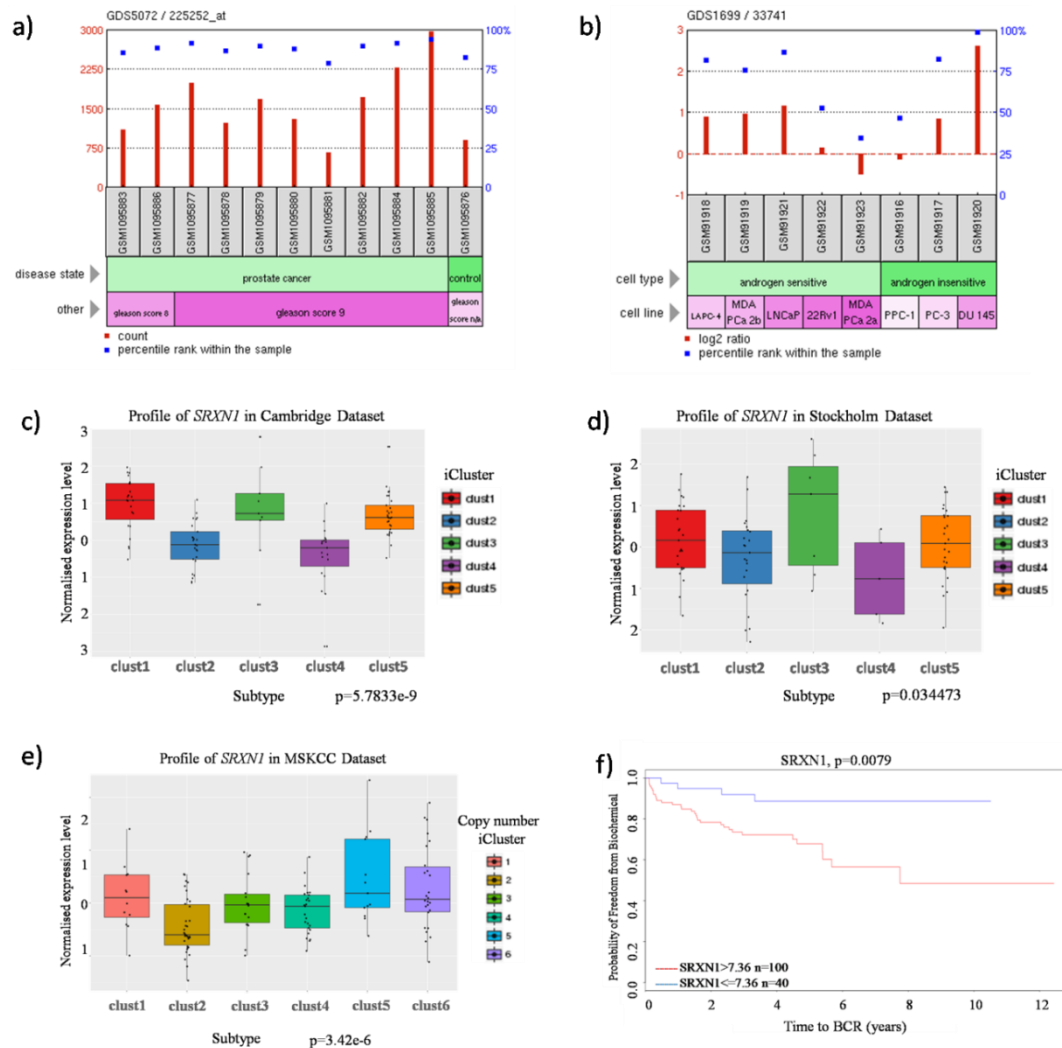

**Figure S2. *SRXN1* expression is increased in advanced prostate cancer (PCa) and in most prostate tumor cell lines, and its overexpression is associated with poor prognosis and lower disease-/progression-free survival. A)** Levels of *SRXN1* expression in wild type prostate (control) and advanced PCa samples (Gleason score 8 and 9) from a study available on the GEO profiles human database (reference series GSE45016) [1]. **B)** *SRXN1* gene expression in different prostate cell lines (androgen sensitive and castration-resistant) obtained from a study available on the GEO profiles human database (reference series GSE4016) [2]. **C)** Expression of *SRXN1* (median) in five PCa iClusters generated by the Cambridge Carcinoma of the Prostate App (CamcAPP dataset) [3] from an integrative study [4]. iClusters 1 (red), 3 (green) and 5 (orange) represent groups of patients with worse prognosis, while iClusters 2 (blue) and 4 (purple) represent groups with better prognosis. Boxplots are significantly different, with  $p = 5.7833 \times 10^{-9}$ . **D)** Expression of *SRXN1* (median) in five PCa iClusters generated by the CamcAPP dataset [3] from an integrative study [4]. iClusters 1 (red), 3 (green) and 5 (orange) represent groups of patients with worse prognosis, while iClusters 2 (blue) and 4 (purple) represent groups with better prognosis. Boxplots are significantly different with  $p = 0.034473$ . **E)** Expression of *SRXN1* (median) in six PCa iClusters generated by the CamcAPP dataset [3] from an integrative study [5]. iClusters 1 (salmon), 2 (dark yellow), 3 (green) and 4 (turquoise) are groups of patients with more favorable prognosis with minimal copy number alterations (CNA), while iClusters 5 (light blue) and 6 (lilac) include most of the metastatic tumors with substantial CNA. Boxplots are significantly different, with

$p=3.42^{-6}$ . **F**) Kaplan-Meier curve displaying the probability of freedom from biochemical recurrence of PCa patients with (red) or without (blue) *SRNXI* overexpression, cataloged by the CamcAPP dataset [3] from an integrative study [5]. Curves are statistically different with  $p=0.0079$ .

## References

- [1] T. K. Satake H Furihata M, Anchi T, Sakoda H, Kawada C, Iiyama T, Ashida S, Shuin T, “The ubiquitin-like molecule interferon-stimulated gene 15 is overexpressed in human prostate cancer,” *Oncol. Rep.*, vol. 23, no. 1, pp. 11–16, 2010.
- [2] H. Zhao *et al.*, “Genome-wide characterization of gene expression variations and DNA copy number changes in prostate cancer cell lines,” *Prostate*, vol. 63, no. 2, pp. 187–197, 2005.
- [3] M. J. Dunning *et al.*, “Mining Human Prostate Cancer Datasets: The "camcAPP" shiny app,” *EBioMedicine*, vol. 17, pp. 5–6, Mar. 2017.
- [4] H. Ross-Adams *et al.*, “Integration of copy number and transcriptomics provides risk stratification in prostate cancer: A discovery and validation cohort study,” *EBioMedicine*, vol. 2, no. 9, pp. 1133–1144, Sep. 2015.
- [5] B. S. Taylor *et al.*, “Integrative Genomic Profiling of Human Prostate Cancer,” *Cancer Cell*, vol. 18, no. 1, pp. 11–22, Jul. 2010.
